# Supplementary material for: Validation of a Standard Luminescence Method for the Fast Determination of the Antimicrobial Activity of Nanoparticles in Escherichia coli
Source: MDPI journal article supplement (doi:10.3390/nano12132164), 2022-06-23
Supplement: s1 [file s1]

# Validation of a Standard Luminescence Method for the Fast Determination of the Antimicrobial Activity of Nanoparticles in *Escherichia Coli*

Gonalo A. Marcelo <sup>1</sup>, Joana Galhano <sup>1</sup>, Maria Paula Duarte <sup>2,\*</sup>, Jos  Luis Capelo-Mart nez <sup>1,3</sup>, Carlos Lodeiro <sup>1,3</sup> and Elisabete Oliveira <sup>1,3,\*</sup>

<sup>1</sup> BIOSCOPE Group, LAQV-REQUIMTE, Chemistry Department, NOVA School of Science and Technology, FCT NOVA, NOVA University Lisbon, 2829-516 Caparica, Portugal; goncalo.marcelo9@gmail.com (G.A.M.); j.galhano@campus.fct.unl.pt (J.G.); jlcm@fct.unl.pt (J.L.C.-M.); cle@fct.unl.pt (C.L.)

<sup>2</sup> METRICS, NOVA School of Science and Technology, NOVA University Lisbon, 2829-516 Caparica, Portugal

<sup>3</sup> PROTEOMASS Scientific Society, Rua dos Inventores, Madam Parque, Caparica Campus, 2825-182 Caparica, Portugal

\* Correspondence: mpcd@fct.unl.pt (M.P.D.); ej.oliveira@fct.unl.pt (E.O.)

## 1. Experimental Procedures

### 1.1. Plasmid Extraction and Purification

For the extraction of the pMV306G13+Lux plasmid [1], the acquired plasmid-containing growth strain, *E. coli* DH5 , was incubated in TSB for 16 h, at 37  C, 210 rpm, and the plasmid was extracted by applying the protocol detailed in the Thermo Scientific<sup>TM</sup> GeneJET Plasmid Miniprep Kit #K0502, yielding a concentration of 27 ng/mL.

Subsequently, the pDNA solution was de-salted to remove salts that could interfere with the electroporation procedure. Briefly, to precipitate the pDNA, 5  L of a 3 M sodium acetate solution (pH 5.2) and 100  L of ethanol 96% were added to 50  L of the plasmid solution. The mixture was left at -70  C for 15 minutes and then, centrifuged (12,000  g, 15 min) at 4  C. The pellet was later washed with ethanol 70% and left to dry at 37  C. Finally, the dry pellet was resuspended in 50  L of sterile deionized (DI) Milli-Q water and stored at -70  C. The resulting plasmid solution was quantified in a Nanodrop 1000 spectrophotometer, in Nucleic Acids mode. Purity was accessed according to the 260/280 nm ratio.

### 1.2. Development of the new *E. coli* Lux strain

#### 1.2.1. Competence induction

Competent bacteria were obtained following an adapted protocol from the MicroPulser<sup>TM</sup> Electroporation Apparatus Operating Instructions and Applications Guide from BioRad126 [2]. In detail, *Escherichia coli* ATCC<sup> </sup> 8739<sup>TM</sup> was grown in L-broth (10 g tryptone, 5 g yeast extract and 5 g NaCl in 1 L Milli-Q water) overnight, at 37  C and 210 rpm. Then, 500 mL of L-broth were inoculated with 1/100 volume of the bacterial culture. The suspensions were incubated at 37  C and 250 rpm, until an OD 600 nm of 0.5–0.7 was achieved. The cells were cooled on ice for 20 min and centrifuged (4000  g, 15 min) at 4  C. All subsequent centrifugations were conducted with the same parameters. Supernatants were discarded and the pellet resuspended in 500 mL of cold 10% glycerol, followed by another centrifugation cycle. This step was repeated 2 additional times, decreasing the resuspending volume of 10% glycerol to 250 and 20 mL, respectively. Following this centrifugation step, the supernatant was again discarded, and the pellet resuspended in 2 mL of cold 10% glycerol. From this suspension, 150  L aliquots were prepared and stored at -70  C.

### 1.2.2. Bacterial Transformation by Electroporation

Electroporation protocols were performed in the Laboratory of Genetics of NOVA Medical School Centro de Estudos de Doenças Crónicas (CEDOC). 8  $\mu$ L of the purified pMV306G13 + Lux plasmid was added to a 150  $\mu$ L competent bacterial aliquot, followed by a gentle homogenization. The suspension was incubated for a brief period on ice and was then transferred to a cold electroporation cuvette. The electroporation parameters were of 2.1 kV, 100  $\Omega$  and 25  $\mu$ F. After the pulse, a  $\tau = 2.4$  was obtained.

The sample was retrieved, and 1 mL of SOC medium (2% tryptone, 0.5% yeast extract, 10 mM NaCl, 2.5 mM KCl, 10 mM MgCl<sub>2</sub>, 10 mM MgSO<sub>4</sub> and 20 mM monohydrated glucose) was added. Bacterial suspensions were incubated at 37 °C and 210 rpm, for *ca.* 1 h, and then plated in kanamycin-TSA (35  $\mu$ g/mL kanamycin).

Plates were incubated at 37 °C, overnight. Transformed *E. coli* cells (*E. coli* Lux strain) were streaked in TSA plates, supplemented with 35  $\mu$ g/mL of kanamycin, and incubated at 37 °C overnight. Finally, isolated luminescent colonies were inoculated into TSB (35  $\mu$ g/mL) and incubated at 37 °C and 210 rpm. Glycerol stocks (15%) were prepared and stored at -70 °C.

## 2. Tables

**Table S1.** Loaded MNs and SPION@MNs cumulative release assay results, in PBS 0.01M pH 7.4 and pH 4.0, at 24h.

| Nanomaterial | Dr g       | Release %<br>(pH 7.4) | Release %<br>(pH 4.0) |
|--------------|------------|-----------------------|-----------------------|
| MNs          | EPI        | 12.7 $\pm$ 3.2        | 45.8 $\pm$ 2.2        |
|              | DOX        | 8.4 $\pm$ 0.2         | 15.3 $\pm$ 0.02       |
|              | OFLO       | 41.5 $\pm$ 1.5        | 52.1 $\pm$ 1.3        |
|              | EPI + OFLO | 12.7 $\pm$ 0.7        | 57.3 $\pm$ 0.5        |
|              | (EO)       | 46.7 $\pm$ 2.2        | 67.4 $\pm$ 0.8        |
|              | DOX + OFLO | 25.0 $\pm$ 0.3        | 62.1 $\pm$ 4.3        |
|              | (DO)       | 38.9 $\pm$ 1.4        | 43.5 $\pm$ 2.3        |
| SPION@MNs    | EPI        | 8.3 $\pm$ 2.0         | 100.0 $\pm$ 57.0      |
|              | DOX        | 10.7 $\pm$ 4.3        | 44.6 $\pm$ 23.9       |
|              | OFLO       | 23.7 $\pm$ 0.9        | 20.8 $\pm$ 0.5        |
|              | EPI + OFLO | 14.5 $\pm$ 1.3        | 80.7 $\pm$ 39.3       |
|              | (EO)       | 38.4 $\pm$ 9.8        | 43.3 $\pm$ 7.6        |
|              | DOX + OFLO | 23.1 $\pm$ 9.4        | 63.0 $\pm$ 21.6       |
|              | (DO)       | 28.8 $\pm$ 6.4        | 58.7 $\pm$ 10.4       |

**Table S2.** Inhibitory concentrations of all SPION@MNs systems against *E. coli* and *E. coli* Lux, for 24 h and 8 h assays, with respective bacterial growth (average  $\pm$  standard deviation).

| Nanosystem     | [NP]<br>[ $\mu\text{g/mL}$ ] | LUX <sub>490</sub>     |                       | OD <sub>600</sub>      |                       |
|----------------|------------------------------|------------------------|-----------------------|------------------------|-----------------------|
|                |                              | Bacterial growth [%]   |                       | Bacterial growth [%]   |                       |
|                |                              | Average<br>( $n = 4$ ) | Standard<br>deviation | Average<br>( $n = 4$ ) | Standard<br>deviation |
| MNs            | 362                          | 51.11                  | $\pm 8.5$             | 76.51                  | $\pm 11.32$           |
| MNs-EPI        | 362                          | 38.73                  | $\pm 9.71$            | 169.13                 | $\pm 7.19$            |
| MNs-DOX        | 362                          | 57.68                  | $\pm 8.26$            | 172.68                 | $\pm 2.73$            |
| MNs-OFLO       | 1                            | 22.85                  | $\pm 7.62$            | 48.01                  | $\pm 5.38$            |
| MNs-EPI + OFLO | 1                            | 0.39                   | $\pm 0.88$            | 55.20                  | $\pm 11.10$           |
| MNS-DOX + OFLO | 0.5                          | 55.87                  | $\pm 2.49$            | 77.80                  | $\pm 21.30$           |
| MNS-DOX + OFLO | 1                            | 70.10                  | $\pm 3.37$            | 91.70                  | $\pm 11.20$           |

**Table S3.** Statistical analysis of the bacterial growth averages obtained from LUX<sub>490</sub> (8 h) and OD<sub>600</sub> (24 h), for all inhibitory concentrations of MNs systems against *E. coli* Lux and *E. coli*, respectively; *t*-test (two-tailed) for  $n = 4$ ,  $\alpha = 0.05$ ,  $t(3, 0.05/2) = 3.128$  ( $H_0: \bar{X}_1 = \bar{X}_2$ ,  $H_1: \bar{X}_1 \neq \bar{X}_2$ , where 1 and 2 stand for LUX or OD depending on the type of interaction).

| Nanosystem        | [NP]<br>interaction<br>[ $\mu\text{g/mL}$ ] | <i>t</i> -score | Result       | <i>p</i> -value | Classification | Type of<br>interaction |
|-------------------|---------------------------------------------|-----------------|--------------|-----------------|----------------|------------------------|
| MNs               | 362 $\times$ 362                            | -6.80           | Reject $H_0$ | 0.00650         | **             | LUX $\times$ OD        |
| MNs-EPI           | 362 $\times$ 362                            | -39.97          | Reject $H_0$ | 0.00003         | ****           | LUX $\times$ OD        |
| MNs-DOX           | 362 $\times$ 362                            | -29.49          | Reject $H_0$ | 0.00009         | ****           | LUX $\times$ OD        |
| MNs-OFLO          | 1 $\times$ 1                                | -9.32           | Reject $H_0$ | 0.00261         | **             | LUX $\times$ OD        |
| MNs-EPI<br>+ OFLO | 1 $\times$ 1                                | -9.91           | Reject $H_0$ | 0.00219         | **             | LUX $\times$ OD        |
|                   | 0.5 $\times$ 0.5                            | -6.56           | Reject $H_0$ | 0.00720         | **             | LUX $\times$ OD        |
|                   | 1 $\times$ 1                                | -0.73           | Accept $H_0$ | 0.51823         | ns             | LUX $\times$ OD        |
| MNS-DOX           | 0.5 $\times$ 1                              | -4.04           | Reject $H_0$ | 0.02722         | *              | LUX $\times$ OD        |
| + OFLO            | 0.5 $\times$ 1                              | -2.07           | Accept $H_0$ | 0.12987         | ns             | OD $\times$ LUX        |
|                   | 0.5 $\times$ 1                              | -12.52          | Reject $H_0$ | 0.00109         | **             | LUX $\times$ LUX       |
|                   | 0.5 $\times$ 1                              | 0.02            | Accept $H_0$ | 0.98529         | ns             | OD $\times$ OD         |

ns  $\equiv p > 0.05$ , \*  $\equiv p \leq 0.05$ , \*\*  $\equiv p \leq 0.01$ , \*\*\*\*  $\equiv p \leq 0.0001$

**Table S4.** Inhibitory concentrations of all SPION@MNs systems against *E. coli* and *E. coli* Lux, for 24 h and 8 h assays, with respective bacterial growth (average  $\pm$  standard deviation).

| Nanosystem           | [NP]<br>[ $\mu\text{g/mL}$ ] | LUX <sub>490</sub>     |                    | OD <sub>600</sub>      |                    |
|----------------------|------------------------------|------------------------|--------------------|------------------------|--------------------|
|                      |                              | Bacterial growth [%]   |                    | Bacterial growth [%]   |                    |
|                      |                              | Average<br>( $n = 4$ ) | Standard deviation | Average<br>( $n = 4$ ) | Standard deviation |
| SPION@MNs            | 81                           | 51.60                  | $\pm 6.66$         | 109.52                 | $\pm 8.33$         |
| SPION@MNs            | 357                          | 1.83                   | $\pm 2.28$         | -4.81                  | $\pm 7.69$         |
| SPION@MNs-EPI        | 170                          | 21.91                  | $\pm 0.95$         | 121.48                 | $\pm 1.99$         |
| SPION@MNs-EPI        | 357                          | 0.93                   | $\pm 1.11$         | 2.37                   | $\pm 1.77$         |
| SPION@MNs-DOX        | 170                          | 20.86                  | $\pm 2.27$         | 96.93                  | $\pm 29.68$        |
| SPION@MNs-DOX        | 357                          | 0.40                   | $\pm 1.85$         | 13.27                  | $\pm 3.28$         |
| SPION@MNs-OFLO       | 1                            | 56.28                  | $\pm 3.81$         | 128.00                 | $\pm 3.31$         |
| SPION@MNs-OFLO       | 2                            | 1.30                   | $\pm 0.58$         | 49.90                  | $\pm 3.30$         |
| SPION@MNs-EPI + OFLO | 1                            | 56.24                  | $\pm 6.135$        | 123.72                 | $\pm 10.03$        |
| SPION@MNs-EPI + OFLO | 2                            | 1.94                   | $\pm 0.85$         | 9.06                   | $\pm 4.71$         |
| SPION@MNs-DOX + OFLO | 1                            | 83.01                  | $\pm 1.79$         | 117.47                 | $\pm 6.49$         |
| SPION@MNs-DOX + OFLO | 2                            | 20.30                  | $\pm 7.25$         | 123.56                 | $\pm 3.14$         |
| SPION@MNs-DOX + OFLO | 4                            | 0.78                   | $\pm 1.22$         | 0.21                   | $\pm 0.05$         |

**Table S5.** Statistical analysis of the bacterial growth averages obtained from LUX<sub>490</sub> (8 h) and OD<sub>600</sub> (24 h), for all inhibitory concentrations of SPION@MNs systems against *E.coli* Lux and *E.coli*, respectively; *t*-test (two-tailed) for  $n = 4$ ,  $\alpha = 0.05$ ,  $t(3, 0.05/2) = 3.128$  (H<sub>0</sub>:  $\bar{X}_1 = \bar{X}_2$ , H<sub>1</sub>:  $\bar{X}_1 \neq \bar{X}_2$ , where 1 and 2 stand for LUX or OD depending on the type of interaction).

| Nanosystem              | [NP] interaction<br>[μg/mL] | <i>t</i> -score | Result                | <i>p</i> -value | Classification | Type of<br>interaction |
|-------------------------|-----------------------------|-----------------|-----------------------|-----------------|----------------|------------------------|
| SPION@MNs               | 81 × 81                     | -23.18          | Reject H <sub>0</sub> | 0.00018         | ***            | LUX × OD               |
|                         | 357 × 357                   | 1.81            | Accept H <sub>0</sub> | 0.16858         | ns             | LUX × OD               |
|                         | 81 × 357                    | 29.34           | Reject H <sub>0</sub> | 0.00009         | ****           | LUX × OD               |
|                         | 81 × 357                    | -26.89          | Reject H <sub>0</sub> | 0.00011         | ***            | OD × LUX               |
|                         | 81 × 357                    | 15.90           | Reject H <sub>0</sub> | 0.00054         | ***            | LUX × LUX              |
|                         | 81 × 357                    | 71.66           | Reject H <sub>0</sub> | < 0.00001       | ****           | OD × OD                |
| SPION@MNs<br>EPI        | 170 × 170                   | -113.81         | Reject H <sub>0</sub> | < 0.00001       | ****           | LUX × OD               |
|                         | 357 × 357                   | -2.09           | Accept H <sub>0</sub> | 0.12753         | ns             | LUX × OD               |
|                         | 170 × 357                   | 26.21           | Reject H <sub>0</sub> | 0.00012         | ***            | LUX × OD               |
|                         | 170 × 357                   | -145.79         | Reject H <sub>0</sub> | < 0.00001       | ****           | OD × LUX               |
|                         | 170 × 357                   | 73.35           | Reject H <sub>0</sub> | < 0.00001       | ****           | LUX × LUX              |
|                         | 170 × 357                   | 259.98          | Reject H <sub>0</sub> | < 0.00001       | ****           | OD × OD                |
| SPION@MNs<br>DOX        | 170 × 170                   | -5.14           | Reject H <sub>0</sub> | 0.01426         | *              | LUX × OD               |
|                         | 357 × 357                   | -9.50           | Reject H <sub>0</sub> | 0.00247         | **             | LUX × OD               |
|                         | 170 × 357                   | 6.42            | Reject H <sub>0</sub> | 0.00766         | **             | LUX × OD               |
|                         | 170 × 357                   | -6.52           | Reject H <sub>0</sub> | 0.00734         | **             | OD × LUX               |
|                         | 170 × 357                   | 30.97           | Reject H <sub>0</sub> | 0.00007         | ****           | LUX × LUX              |
|                         | 170 × 357                   | 5.67            | Reject H <sub>0</sub> | 0.01085         | *              | OD × OD                |
| SPION@MNs<br>OFLO       | 1 × 1                       | -76.20          | Reject H <sub>0</sub> | 0.00334         | **             | LUX × OD               |
|                         | 2 × 2                       | -29.92          | Reject H <sub>0</sub> | 0.00008         | ****           | LUX × OD               |
|                         | 1 × 2                       | 6.71            | Reject H <sub>0</sub> | 0.00675         | **             | LUX × OD               |
|                         | 1 × 2                       | -77.77          | Reject H <sub>0</sub> | 0.00083         | ***            | OD × LUX               |
|                         | 1 × 2                       | 29.22           | Reject H <sub>0</sub> | 0.00009         | ****           | LUX × LUX              |
|                         | 1 × 2                       | 607.55          | Reject H <sub>0</sub> | < 0.00001       | ****           | OD × OD                |
| SPION@MNs<br>EPI-OFLO   | 1 × 1                       | -17.01          | Reject H <sub>0</sub> | 0.00044         | ***            | LUX × OD               |
|                         | 2 × 2                       | -3.08           | Accept H <sub>0</sub> | 0.05426         | ns             | LUX × OD               |
|                         | 1 × 2                       | 23.97           | Reject H <sub>0</sub> | 0.00016         | ***            | LUX × OD               |
|                         | 1 × 2                       | -24.37          | Reject H <sub>0</sub> | 0.00015         | ***            | OD × LUX               |
|                         | 1 × 2                       | 17.87           | Reject H <sub>0</sub> | 0.00038         | ***            | LUX × LUX              |
|                         | 1 × 2                       | 25.89           | Reject H <sub>0</sub> | 0.00013         | ***            | OD × OD                |
| SPION@MNs<br>DOX + OFLO | 1 × 1                       | -11.05          | Reject H <sub>0</sub> | 0.00159         | **             | LUX × OD               |
|                         | 2 × 2                       | -31.63          | Reject H <sub>0</sub> | 0.00007         | ****           | LUX × OD               |
|                         | 4 × 4                       | 0.94            | Accept H <sub>0</sub> | 0.41643         | ns             | LUX × OD               |
|                         | 1 × 2                       | -31.46          | Reject H <sub>0</sub> | 0.00007         | ****           | LUX × OD               |
|                         | 1 × 4                       | 92.14           | Reject H <sub>0</sub> | < 0.00001       | ****           | LUX × OD               |
|                         | 2 × 4                       | 5.55            | Reject H <sub>0</sub> | 0.01156         | *              | LUX × OD               |
|                         | 1 × 2                       | 60.38           | Reject H <sub>0</sub> | 0.00001         | ****           | OD × LUX               |
|                         | 1 × 4                       | 36.60           | Reject H <sub>0</sub> | 0.00004         | ****           | OD × LUX               |
|                         | 2 × 4                       | 84.74           | Reject H <sub>0</sub> | < 0.00001       | ****           | OD × LUX               |
|                         | 1 × 2                       | 17.87           | Reject H <sub>0</sub> | 0.00038         | ***            | LUX × LUX              |
|                         | 1 × 4                       | 124.20          | Reject H <sub>0</sub> | < 0.00001       | ****           | LUX × LUX              |



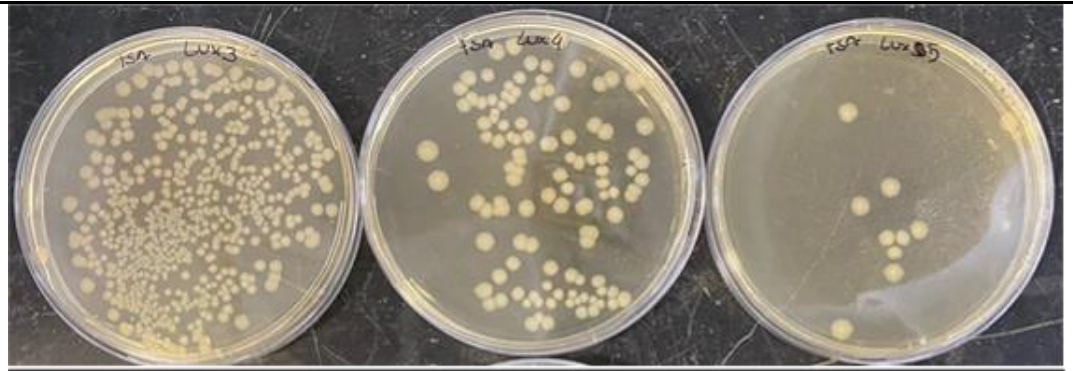

| Plate                                        | Expected CFUs | Counted CFUs |
|----------------------------------------------|---------------|--------------|
| TSA Lux3 (100 $\mu$ L of $10^{-4}$ dilution) | 1000          | >300         |
| TSA Lux4 (100 $\mu$ L of $10^{-5}$ dilution) | 100           | 115          |
| TSA Lux5 (100 $\mu$ L of $10^{-6}$ dilution) | 10            | 10           |

**Figure S2.** Plates with the dilutions  $10^{-4}$  (TSA Lux3),  $10^{-5}$  (TSA Lux4) and  $10^{-6}$  CFU (TSA Lux5) for CFU counting of luminescent *E. coli* Lux suspension.

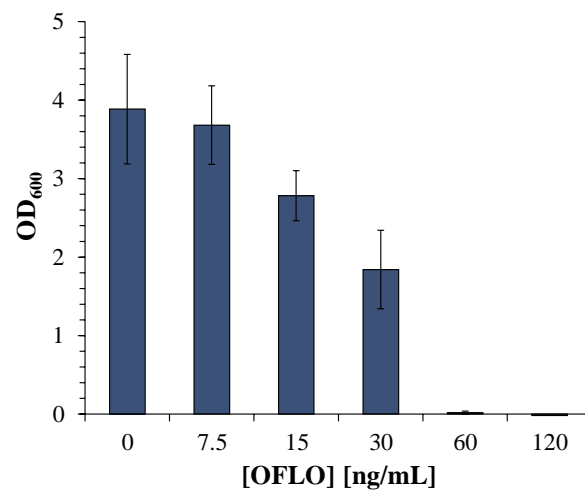

**Figure S3.** The susceptibility of the wild-type parent *E. coli* (ATCC® 8739™) to ofloxacin, given as raw OD<sub>600</sub> vs. concentration of OFLO.

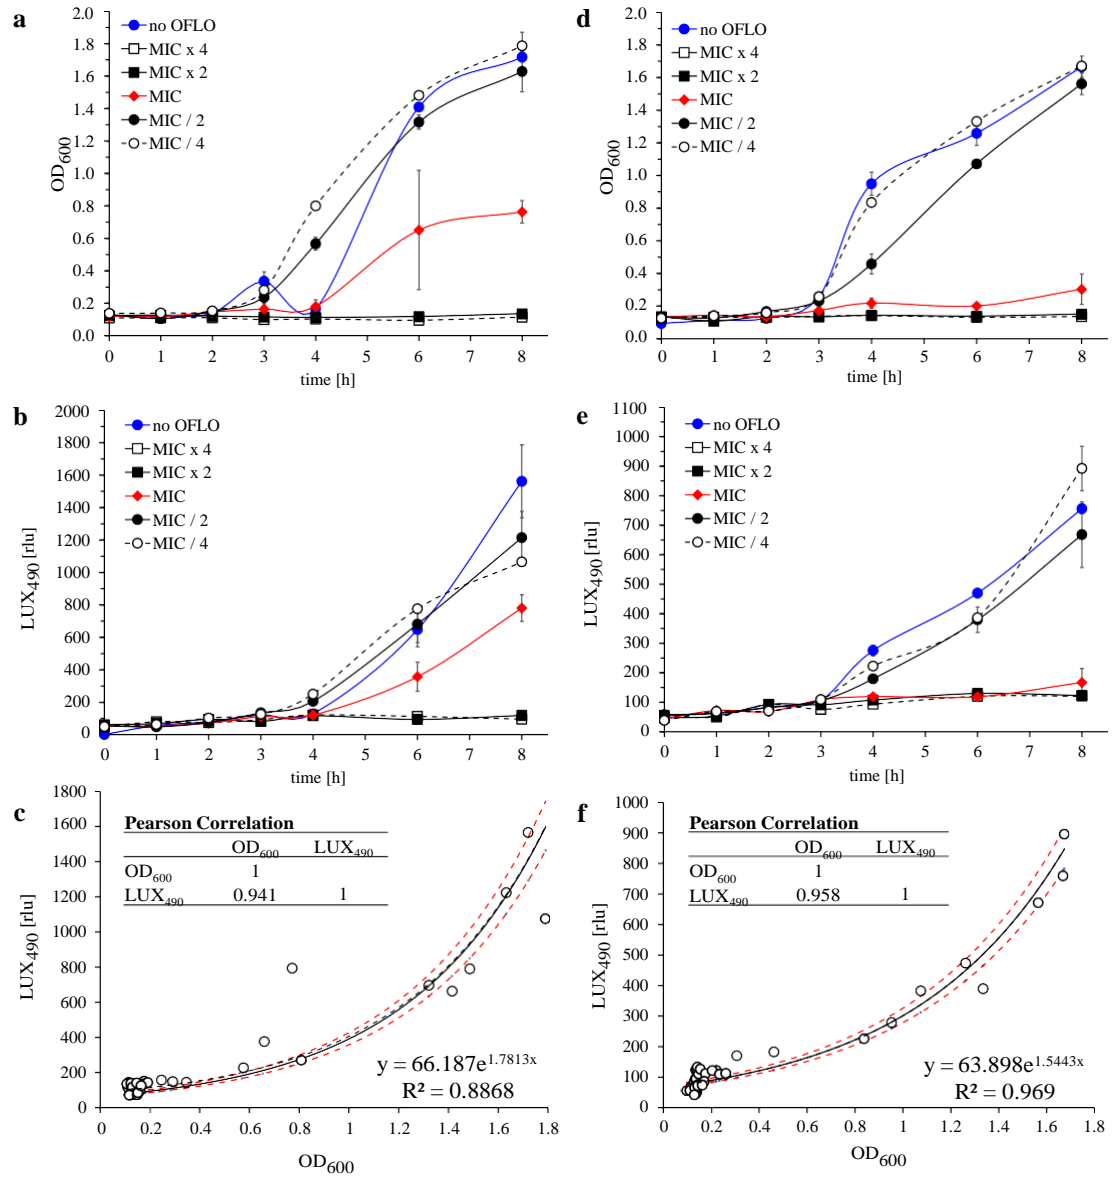

**Figure S4.** E.coli Lux growth data under shaking (a,b) and static (d,e) conditions, collected as  $OD_{600}$  and  $LUX_{490}$ ; successive dilutions from MIC = 30 ng/mL. Plotting of all average  $OD_{600}$  vs.  $LUX_{490}$  with respective exponential regressions and Pearson correlations, for shaking (c) and static (f) conditions.

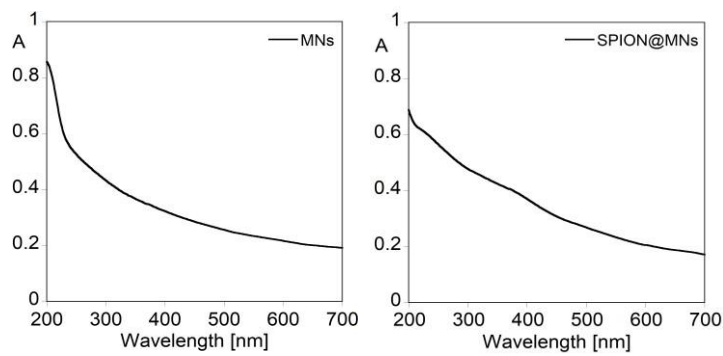

**Figure S5.** Absorbance spectra of MNs and SPION@MNs, in water.



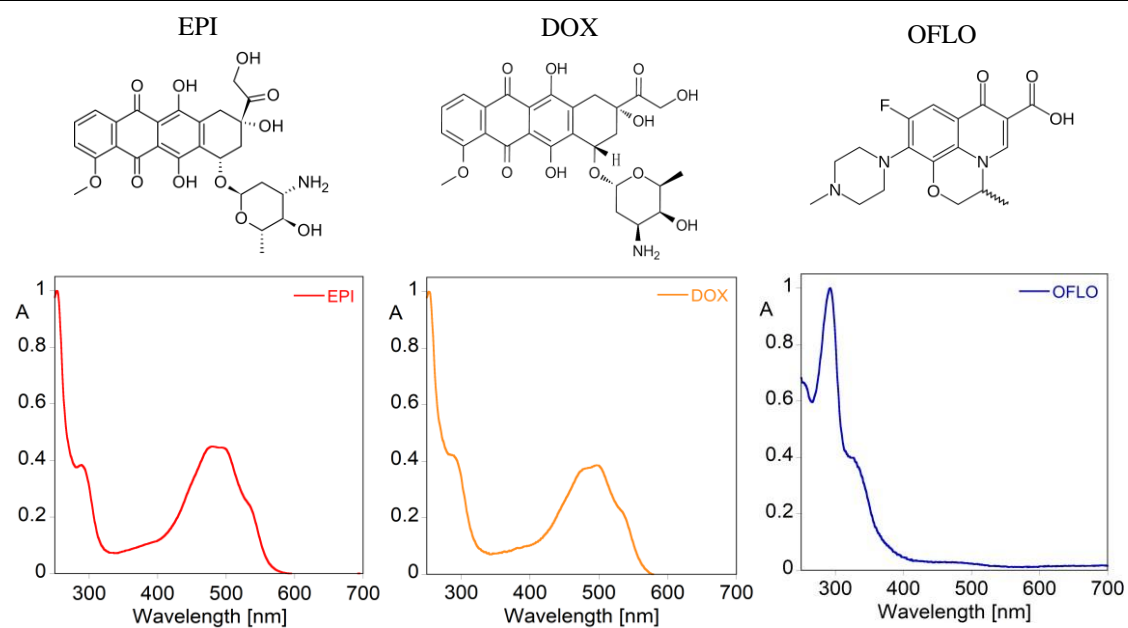

**Figure S6.** Structural representation of all model drugs and respective absorbance spectra: epirubicin (EPI), doxorubicin (DOX) and ofloxacin (OFLO).

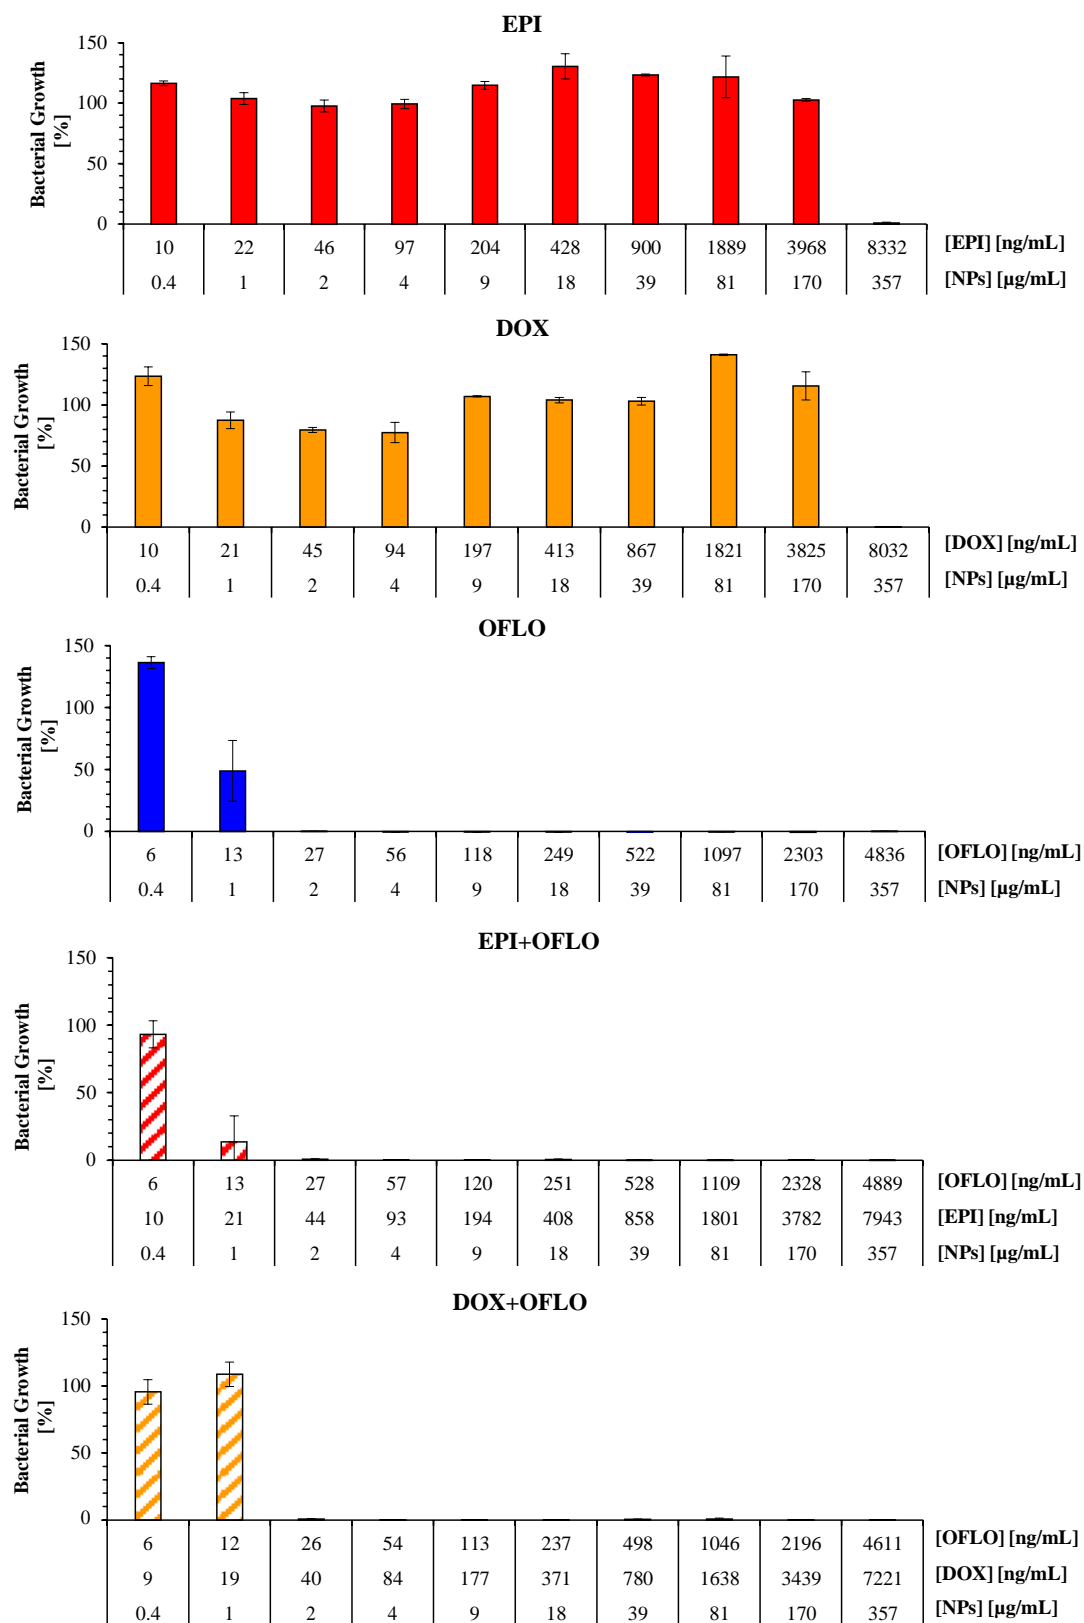

**Figure S7.** Antimicrobial activity of single and combinatory drug controls on the parental *E. co.* strain, measured as the bacterial growth calculated by OD<sub>600</sub>; drug concentrations in ng/mL and respective equivalent nanoparticles concentrations in μg/mL.

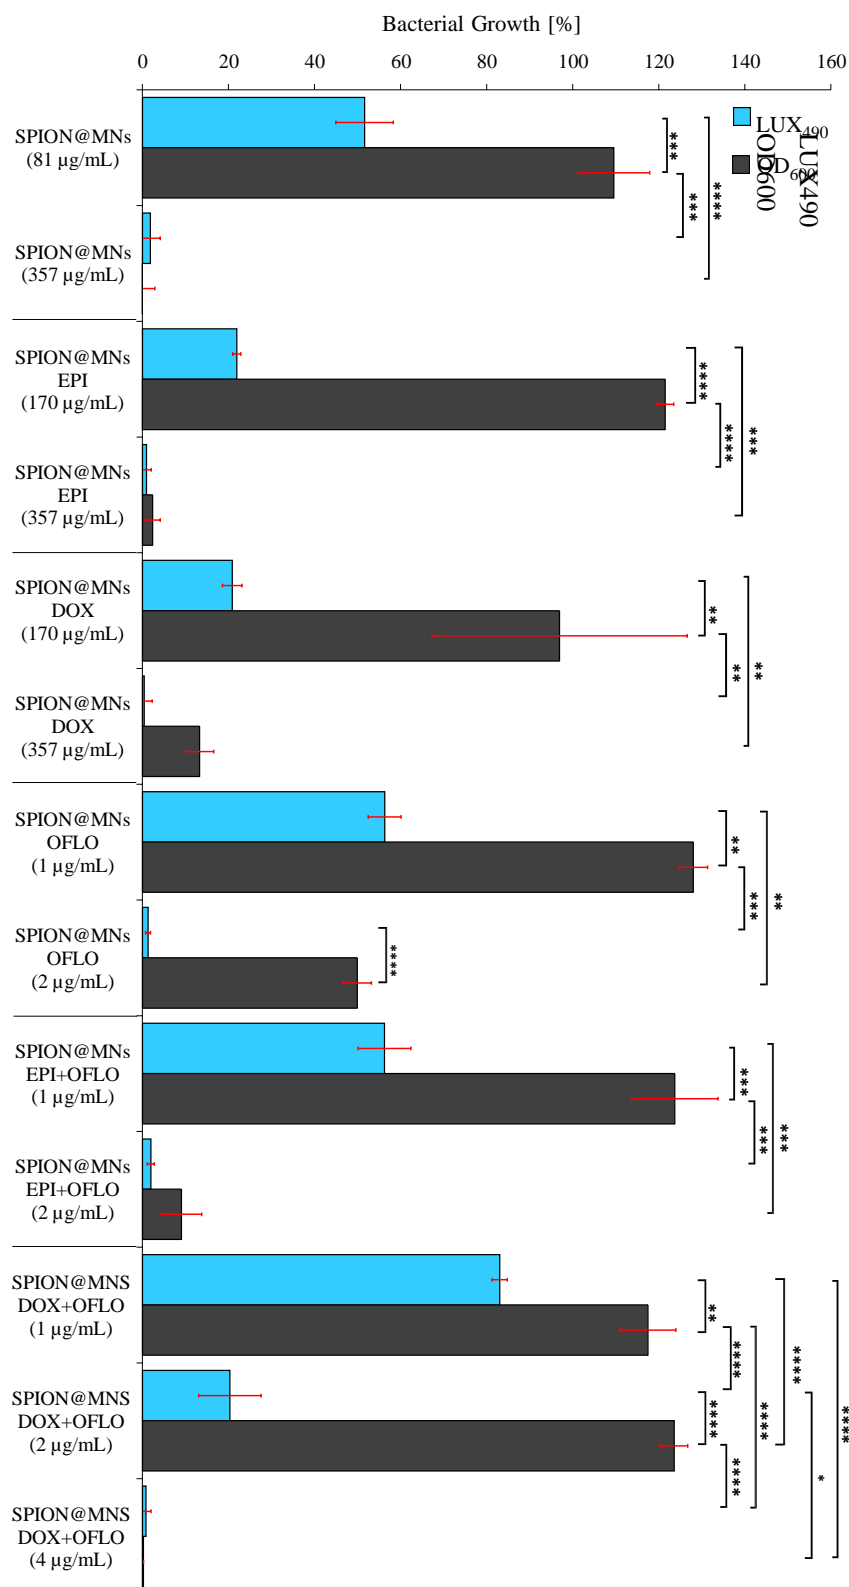

**Figure S8.** Statistical comparison of the obtained relative growth reduction, via OD<sub>600</sub> 24 h-assaying the parental *E. coli* and LUX<sub>490</sub> 8 h-assaying *E. coli* Lux, for all SPION@MNs systems (concentrations related to nanoparticle); statistically significant levels represented as \* =  $p \leq 0.05$ , \*\* =  $p \leq 0.01$ , \*\*\* =  $p \leq 0.001$ , \*\*\*\* =  $p \leq 0.0001$ .

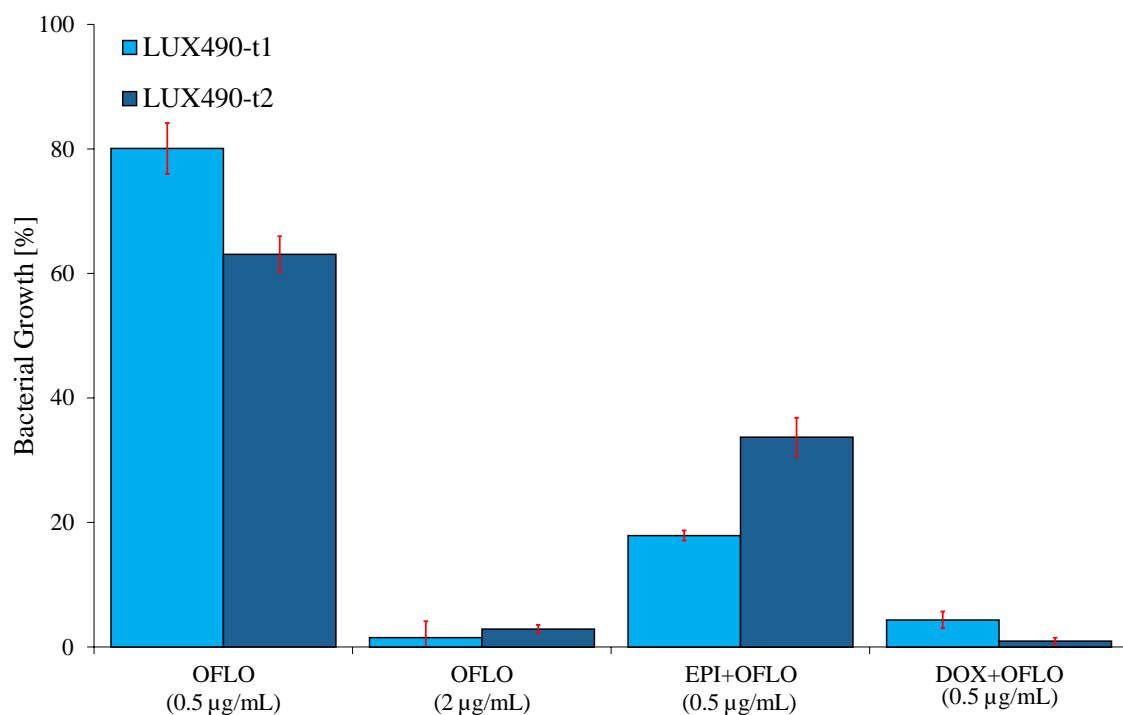

**Figure S9.** Statistical comparison of the MIC<sub>50</sub>/MIC<sub>90</sub> obtained, via LUX<sub>490</sub> 8 h-assaying of *E. coli* Lux, for trial 1 (t1) and trial 2 (t2), of all OFLO-containing drug combinations; statistically significant levels represented as \* =  $p \leq 0.05$ , \*\* =  $p \leq 0.01$ , \*\*\* =  $p \leq 0.001$ , \*\*\*\* =  $p \leq 0.0001$ .

## References

1. Andreu, N.; Zelmer, A.; Sampson, S.L.; Ikeh, M.; Bancroft, G.J.; Schaible, U.E.; Wiles, S.; Robertson, B.D. Rapid in vivo assessment of drug efficacy against *Mycobacterium tuberculosis* using an improved firefly luciferase. *J. Antimicrob. Chemother.* **2013**, *68*, 2118–2127. <https://doi.org/10.1093/jac/dkt155>.
2. Bio-Rad Laboratories. MicroPulser™ Electroporation Apparatus Operating Instructions and Applications Guide. Bio-Rad: Hercules, CA, USA, 2016.
3. Addgene. Sequence Analyzer: pMV306G13+Lux. Available online: <https://www.addgene.org/browse/sequence/12288/> (accessed on 21 December 2021).
